# Supplementary material for: The miRNAome of Catharanthus roseus: identification, expression analysis, and potential roles of microRNAs in regulation of terpenoid indole alkaloid biosynthesis
Source: PubMed Central journal article supplement (PMC5320439; doi:10.1038/srep43027), 2017-02-22
Supplement: srep43027-s1.pdf [file srep43027-s1.pdf]

**The miRNAome of *Catharanthus roseus*: identification, expression analysis, and potential roles of microRNAs in regulation of terpenoid indole alkaloid biosynthesis**

Ethan M. Shen<sup>1†</sup>, Sanjay K. Singh<sup>†</sup>, Jayadri S. Ghosh, Barunava Patra, Priyanka Paul, Ling Yuan\*, and Sitakanta Pattanaik\*

Department of Plant and Soil Sciences, University of Kentucky, 1401 University Drive, Lexington, KY 40546

<sup>1</sup>Math, Science, and Technology Center, Paul Laurence Dunbar High School, 1600 Man o' War Boulevard, Lexington, Kentucky 40513

† These two authors contributed equally to this work.

\* To whom correspondence may be addressed. E-mail: spatt2@uky.edu; [lyuan3@uky.edu](mailto:lyuan3@uky.edu)

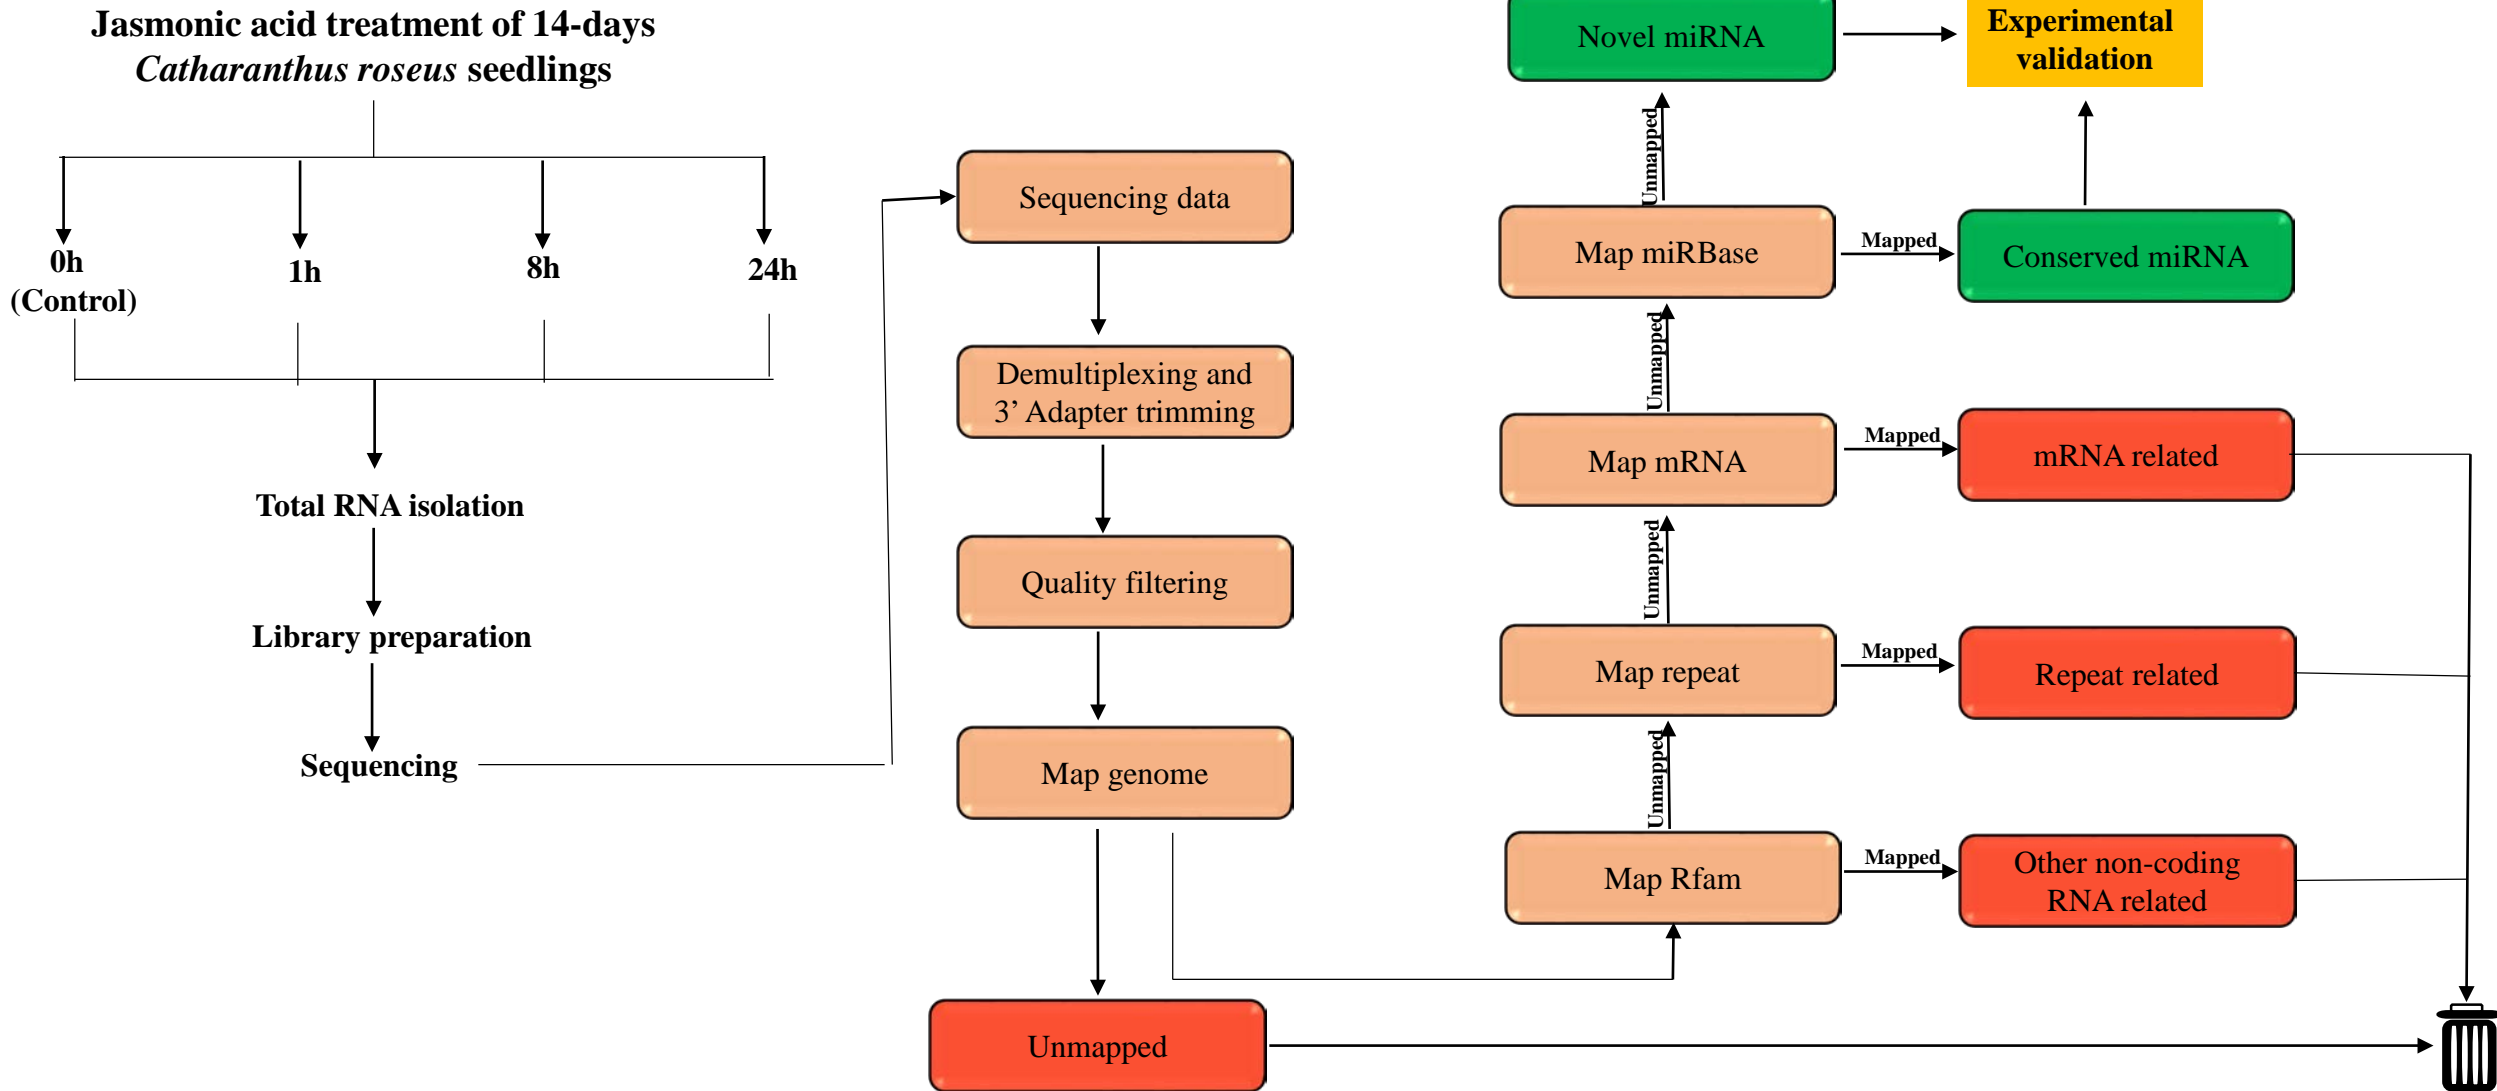

**Figure S1.** Schematic diagram of the experimental procedure of JA-treatment and miRNA identification in *Catharanthus roseus* seedlings.





















>cro-miR399-7

CAUGCAUGUGUAUAUAUAAUAAUUUUUCCUUUUUGCCAAAGGAGAAUUGCCUGCAAUUCAGUCUCGCAC  
UGCAGCUAGCUAGCGCUUCUUGAGAUGCAUCAUAAAACGUUUCUAAUCUUGCUGUACAUACGUAGUUAAG  
GUUUGAUUUUAAAUCUCUGGGAAAAUAUUCGGAUCAGUUUAUAUAUAUAUAUAUAUG

(((.....))).....(((.....))).....  
.....)

>cro-miR408

AAGAGAGAGCGAGAGAGAGAGGAAAGGGCAGCCAGGGAGAGGCAUGGAAUGGAAAGGCC  
ACAAACAGACAUCAUAGAAUGAAAGAAAUGCUAGAAUGCUCCAUUUCAUGCUCUGUCUGUCCCGUCUG  
UCCUUAACAACAUACUAGUUUCUCCUUACCUU

.(((.....))).....(((.....))).....  
.....)

>cro-miR477

GCUCUUUUUUGUUAAACUCUCCUCAAGGGCUUCUGGCCUCAUCUUGCUAAUCUUAUUGCCUCUUUGUCUU  
AAUGGAAUAAAGAGGGCUAGAAGAACUUGAGGGAGAACUGACAAAUUGC

.....(((.....))).....(((.....))).....  
.....)

>cro-miR5532

UAUUCACCUCUUUGAGCUUCUAUUGAAUCGAGAAUAGGUUUGAUUGCAUCUUUUUGACAUUUCUAAAG  
GCAUUCUCCGGAUAAUJCAAUCGAAGCAAUUAGGUUAUCCAUCGGGCCUUAUUGACAUUGAGCGAUCAA  
AGAAAUACUCCACCUUUGUCAUUAUUCUACAUCACACUAGAUAGUAUCAUAUUCUUGGAAUACGAUUC  
ACUUUCAAGAUGCCUUGGUGGUGAAUAGUAGACACGCGAGACUCAAAAUCUGUCUAAAGAGCGUGAGG  
UUUGAGUCCUUAAGGCAUAAUACGGAGAAUGCUCAUUGAAUGAGCAAUUAAGCGAGCUCGGAUC  
GAAUCGGUAUAUA

.....(((.....))).....(((.....))).....  
.....)

>cro-miR8016

CAACUUAUGAUUCGUAUUCGUAUGGUUUUUAUUCAAAAUAUAUUUGUUUGCAUCAUCUUCAAAGG  
AAUGAAAGUUUGCAUCAUUAUAUCAAUAUAUUUUUGAAUAGAGGCCAUGUGUGUCAUUAUCUUGA  
AACUUUG

.....(((.....))).....(((.....))).....  
.....)













AGAGAAGUUAGAAAGA**AACUGUGUAGAGAGAGAAAGAU**AAGAAAAAAUAAUGAUUUUUUUCUCGUUAUAC  
AUUCAUUAUCUCG

.((((...(((.....(((((((.....))))))))))..))))).)

>cro-novel129

UU**ACGAUCUUGCACCUGACAUGC**UAAGUGAAAGAUUUUGAGUUCAAGUCACUUAUAGAGCAGGUUAAUA  
UCGUAU

.(((((((.....))))))..))))).)

>cro-novel13

CCUUAUACGACAAUGAUAGAUAAUUUUUUGCUAAUUUAUUCGCAUGACAUUACAUGUCAUCUUUAUAC  
UAAGGAUAAAAUCGUCUAACUAAUUUUUAAGUCCCAAUCCAUCACUGGAAUGGGUCAAAAUGAACUUGUC  
AAUGUUUUGUAUCGGCACAUAAGUCGAAUUUAUUCAAAGCAUCCAUAUGUUGAUUAGUGUUUA**AU**  
**UGGCUGGACA**UUUU**AUCC**UUACUAAAGAUAAUUAUUUGAAUGUCAUGAAUACAAAUUGGACAGAAUCA  
CCUAUCAUCGCCGUUAAGA

.(((((((.....))))))..))))).)

>cro-novel130

AAGGUCGGAUUUGGAGCCAUAAAUUUAUUCUAGAGAGUUUGGGUUUGAAUCCAUAUUUACUUAAGG  
**AUACGAAUCUGAAUUUGAAAUA**CCCAAAGAUCUA

.((((...(((.....))))))..))))).)

>cro-novel131

AAGGUUUAUUUAAGCUUGAAAGAAGUGUCCGGUUGAAGUUAAAUUUGUUGCACAUAUAUGAGAGUGU  
GUU**AAAGUAACUGAUGAUCUUCUUGAAC**GUAAUUUAACUUA

.(((((((.....))))))..))))).)

>cro-novel132

CGAGUAUUGUCAGCGUUAUGGAUGCUCUGAAAUAAAAUUGUCAAGUUCUUAUUUAAUAU**ACCGUGAUA**  
**AUGCUGUAACACUUU**

.(((((((.....))))))..))))).)

>cro-novel133

AUUGAUUAUAACUAGGAUAC**UCUGUAUUAUCUCUGAUUAUAGC**AGUAUUCUUUAUUAGAGGUUGGUUA  
GAAUCCUAUAUUGAUUAGG

.((((...(((.....))))))..))))).)

>cro-novel134

AAGAAAAUCGGAUCGGACCGACCAUCAUGACUUAAGAAUCGAACU~~UUAGACCGAUCUGAUUUUCUC~~

.(((((((((((((((((((.....))))))))))))))))))..

>cro-novel135

UGAAGAAUUCUUAAGGGACCGCAUAUUCAGGUCCAUA~~CGUUGCUGUAUCUCUUAAGAUUUCUUUU~~

.(((((((((((((((((((.....))))))))))))))))..

>cro-novel136

AUAUGGGAUUGUCCACACCCCAACUCCAGGCAUGGACAUCUGAAGCGUGA~~AGUUUGUAGGACUGGACAUC  
UAUGA~~

.(((((((((((((((((((.....))))))))))))))))..

>cro-novel137

AGCCUCUUGUGUCUUUCUGUAGGGUUAACUUCUGUUAUUUUU~~UCAGUCUGAUAGUGAGAUUCUAC  
UGAGCGGCA~~

.(((((((((((((((((((.....))))))))))))))))..

>cro-novel138

UGGUUUUAUUCUUCUUAACACUUAUACACCCUGUUAUUGAUUAUAAAGAGAAGAACAUGAAGAGUA  
AUAUGACUUAUUAUGCCACA~~UAUCUAUGAGUGAAGACAUGAAUCU~~

.(((((((((((((((((((((((.....))))))))))))))))..

>cro-novel139

CAUUGAAAUGGUGACAAGUAGGAAUCACAUGCAUCAUUCUGUAAUGAAUAU~~UACCUUGCUCGUCUUCU  
AUUJCAUU~~

.(((((((((((((((((((((((.....))))))))))))))))..

>cro-novel14

GCGGUGUAGGAGCAUAUCAUGAGAAGGAAGGCAGUGCAAUGCAGCCAAGGAUGAAUUGCCGGCGUGACGA  
AUCAUGGCAAUAGAGGCAUUAUUAUUCUGCGUCGGCAGUUUGUCACUUGGCUACG~~UUGGGCUCCUU  
CCUUUCAUGUUAUGCAACACACCGA~~

.(((((((((((((((((((((((((((((((((((((((((((((((((((((((((((.....))))))))))))))))))))))))))))))))..

>cro-novel140

AUGCAUGCAAAAU~~AACGAAAGUCAAGUAGAGGACGGU~~UGUCAAGAAGAAAACCAGUCUCCUCUCGAAUU  
CUGUGAGCGCGAAAUGUAA

.(((((((((((((((((((((((.....))))))))))))))))..

>cro-novel141

GAUAGUGCAACGCGUAGAUCUAAUAGU AACAGUAUUUAUUGACUAACUAUUUAACAAUUGUCAUAACAG  
UUUGAAGGGCAAGAAUCUCGUUAAUCUAGAUUCUAGUCUCUUAUUUAUA

.((((((.....(((((.....(((((((.....(((((((.....(((((((.....(((((((.....(((((((.....)))))).....)))))).....)))))).....)))))).....))))).

>cro-novel142

AAUUUUCGGAAGCUUAGAUGAAGCUAAGAAAACACAGCGGACAUAGUUCAUACAUGGCACAAUUUAUUGCA  
GUUUCUGAAGAUG

.((((((((((((.....((((((((.....((((((((.....((((((((.....((((((((.....)))))).....)))))).....)))))).....)))))).....))))).

>cro-novel143

ACAUGAGCAUCAGAUCAAAAUAUGGAGAUAAAGUAAAAUAACCUUGUAUUAUGUAUUUUGAUCUUG  
GUAACAAUACAUGC

.((((.....((((.....((((.....((((.....((((.....((((.....)))))).....)))))).....))))).)

>cro-novel144

CUUAAUCUAUAAUUAUAGUCAUGGGUAUGGAGCCAACUUCUUCACAUGCGUACUGUUGUCCAAACUUCUGAC  
AUAAUUGGUUGGA

.((((.....((((.....((((.....((((.....((((.....)))))).....)))))).....))))).

>cro-novel145

UUGCUCGACGUCUAGGUAGAAGAUAAAUAUGGUAAUUCAGUUAUUUCAAACUGGAGGUUAGGUAC

.((((.....((((.....((((.....((((.....)))))).....)))))).....))))).

>cro-novel146

UCAAGUAUGAACCGACGAGUAUUC AUGGCACAAAGAGUAAGUUGUAAGUACCGUUAGACUCAUGAGUUG  
C

.((((.....((((.....((((.....((((.....)))))).....)))))).....))))).

>cro-novel147

AUGCAUGAUGUGAUUCGUGACUCCUCACUAAAAGAGUAAGAUGUUGUGAGUUUGAGUCAUGUAC

.((((.....((((.....((((.....((((.....)))))).....)))))).....))))).

>cro-novel148

AGGGUCUGGAUUUGGAUCUAAUUUCACUAUAAGGUUCUAAGUUUUGGAAUAUUCGGAGGGUUUAGAUGCA

.((((.....((((.....((((.....((((.....)))))).....)))))).....))))).

>cro-novel149





AAAUGAUCAGCCUGAACGUGAAUGAUUAAAGAAAUAUUACUCCUUAUAGGUUGGACGUUC

.((((((((((((((...(((.....)))))))))...)))))))).

>cro-novel164

GCUAAUCGGGGCUAAGAUCAGUCAAUUCGAAAACAAUAAAUAAGGAAUUAAGAGUAAGAGGGAUCUUGAA  
CUAAGAAAUAGA

.(((.(.(((.....(.....))))))..)).

>cro-novel165

AAGGUUCAAUGUAAAGAUCUGAUUUUAUGACGGUAUAAUAAAAGUUCAGAUGUUUAGAAACUUG

.((((....((((.....(.....))))))..)).

>cro-novel166

CAUAAAUAAGUUUUUUUCAAUAGAUUGGAUUGAGACGUAAAUGAUGUUAAAAGUAUAAUUUAUCCUC  
UUACAAAUAAUUUAUA

.((((((((((((.....(.....(.....)))))))))...)))))))).

>cro-novel167

CGUAUCUUUCGAUCAAUACUGCGUUAUUAAUAUGUUAAGAAUCUCGUAUGACUAGUAUUUGAUAAAUA  
AUUACU

.(((.....((((.....(.....)))))).....)))))))).

>cro-novel168

GAUUCUUUUGUAAUGAAAACUUUUGAAAGUAAUACGUAAGAGAUUGAUUUGAAGAGAGUA

.(((((((.....(.....(.....))))))..)).

>cro-novel169

AGGACUGCCUAAGUCUUUAUAAAUAUGAAUUAUUUUUAAUUAAGCCGAUUAAGAUUCUCUUUCUCAA  
CAGUUC

.((((....((((.....(.....)))))).....)))))))).

>cro-novel17

GUUACUUAAAGUCGCAUUUAACCGAAGUCAUUUUUUUUUCCCUUAACUUAAAUAUUUGUAAAAAGUA  
AUUUACCACAUGCAUCUUUUUUUGCGGGCUCCACCGGUUAGUGGUGGCAUGCCACUUUUUGAUACGAU  
UAAUUUAAGGGUAAAAGACAAAAGACGACUUUGGGAUUAUAGCGAUUUUAAGUAAA

.((((((((((((.....(.....(.....)))))))))...)))))))).

>cro-novel170

GUAUAUAAUAAGAUCUACUUGCAUACUGUACUCAUCGUUAUUGAAGUAAAUUGAUUAAUUGUUAG

.(((((((.....)))))))).

>cro-novel171

AUGCAUCUGUUAUUCGUCUUGGAACAAACCACCACUGGUUAUAAAUUUAAAUGAGAAAAACAAGUCCAC

.(((((((.....)))))))).

>cro-novel172

UGUAUUUUUGCGUAUCCUCUUAUUUUUGAAAAAUGGAAACUUAGGUAAGUGCUUUAGAAUAUA

.(((((((.....)))))))).

>cro-novel173

AUAAGAUCAAUUAUAUGUAAGACUGAAUAUAUGAACUGUUUAUAAAUGAUUCGAACUAA

.(((((((.....)))))))).

>cro-novel18

AAAAUACACCAUGUGGACAGUUGAGCCAUGCGCUGGUGCGAGUAGGGUAAUCCCACACCAAGACUUGGUG  
UGAGGAUACCCUACUCGCGCAAAGACGUGGCUAAGUGUAUAUUGGUGUAUUUUU

.(((((((.....)))))))).

>cro-novel19

AGUAUGACAAAUUGUACUCAACGUGAUACUUUUUCGAUACAUUUAGGUUUGUGUCAUGCACAUGAGUC  
UUUUUAUAAAGAAUUUUAGUUUUAAAGUGGUAAUUUAAAAAAAAAAUUAGAUGAUGUGUACUAGAA  
GAUGAUAGAGAUUGUAUUUGUUGAUGCGUCCUUUAGUUAUGUAGCUGUAUUUUAAUAAGGAAUAAU  
GUGCAGCAUACCUAAAUAUAUUAAAAUUAUUGCGUUGAGUAAAUUUUGUCGUACC

.(((((((.....)))))))).

>cro-novel2

GCUUCUGUCGUUCAUUCGUGACUACGGUUUCAGCAAGGGGGUUGUCAACAGAGGGCAAGGAUCUUCAGGC  
AACACUGGACAUUAUUUUUGUAGAGAGAGAAAGGUUUUAUGUUUAAAUAUUUUUUGAGUUACCC  
UUUAUUUUUCGAGUUCGGGUCGAUAAAGAUAAUCUGGAAUUCUAUAAGGAUAACUCGAAAACUUUAU  
AUGUCUGGUGUUGCCUGAAGAUCCUUGCCUCUGUUAACAACCCCUUCUUGAAACUGCAGUCACGAACGA  
ACGAUGGAAGA

.(((((((.....)))))))).

>cro-novel20







>cro-novel30

AGUCAAAAUAUUUUAUACGUUUUUUAAUUACUCCCACAAGCCCAUGUGAUGACUUGUUUUGUCAUCACA  
UGGGCUUGUCGGGAUUGGUUCUAAAUGGAUGAAAUAUUUUUUGACG

.(((((((((((((((((((((.....))))))))))))))))).))))).))))).))))).))))).))))).

>cro-novel31

AGGAUCGUGUGUAACAUUUCCUGUAACAUCUCUUGUAACAUAUUAUCUUAUAAUAUAUUUUCUCCCUUA  
GGGUUUACCUUUUGCCCUAGGGUUUAUAUUUUUAUUUGAUAUGUUUUUAUAAUAAAUAUACCAAUUA  
UGAAUGUUAACAAGAGUGACAUAAGGAAUGUUACAGAAAUCCA

.(((.(.(((((((((((((((.....))))))))))))).))))).))))).))))).))))).))))).))))).

>cro-novel32

AUUUGUAUACUUGAGUCACACCCUGGUGCGAGUAGGGGUUAUCCCGCGCCAAGGCCUGGUGUAGGGUAUCU  
CGUACUCGCGUCAGAACGUGGCUCAAUAUGCAGAG

.(((((((((((((((((((((.....))))))))))))).))))).))))).))))).))))).))))).

>cro-novel33

UUGGAGGGGAGUUGAAAGAGAGGGCAGACUCGCGUAAGAUAGACCGUGGGAAUCUUCGAAUCAAGCAACUU  
GGUUGCGCUUGCUCUUCUGCUUCACAACUGUUAUUUGCGUGCUUCGUACGGUCUAUCCAACGCUAUCUG  
CAUUCACACCGCUCUCUUAU

.(((((((((((((((((((((.....))))))))))))).))))).))))).))))).))))).))))).

>cro-novel34

AGAGGUUCAGUACGCAGGAGAGAUGGCGCCGUCGACUAGUUCAGUCAGUUUCUACAGAGAUUUUAGACUG  
GAAAGUAAGACUUGUCGAUGGCAUCAUCUCUUGCGGACUGAACCUUG

.(((((((((((((((((((((.....))))))))))))).))))).))))).))))).))))).))))).

>cro-novel35

AAAAUUUUUAUUUAUGGAUAAGGUUAUCUCCUAUCUUAUGGACCUUUUAGCUUGUAGUAAGGUACAUCAU  
CCCUCCUUGGAUUCUUGUUUCCGUAAUCUGAAGAUUGAUGAACAAGAAUUAUUGAUGUAACUUAUACAA  
AGCAAGAAGUCUAUGAGUAGAGAUACGGAUCUGUUCUAUAAAAGAAUUUC

.(((((((((((((((((((((.....))))))))))))).))))).))))).))))).))))).))))).

>cro-novel36

CGAGACAUGAACCUUGAACUUAUUAACCCACUUCAUUCAUGUGGUUAAUACAUUAUCUUUUUUAUUAU  
GCAUAAAUGAAGAUUAUUCUACAUAGUGACGUGGCUUAAUUAJAGUUAAGAGGUUCAUUCUCA

.(((.(((.....(((.....)))))))))))))

>cro-novel37

UAAUGUUACAGAGAGUGUACAGGAAUGUUAACAGGAUCUGAACCGGUUGAUAGAGACUAUGAGGGC  
GAGAAUUUGACUGUUCGGAUCUUUUAACAUAUUCUGUCAUCUCUUGUAUAUUC

.(((.....)))))))))

>cro-novel38

AUGGCAUAUCCGGAAAAUAUCACGCUCAAGUUAUGUGGUCACCAUAACAAAUCAGCCAAAGACAAU  
UGCAUUGUCCGGUGAGCACGUGACUUGGGCAUGGUUUAUUAAGCUGGAUUCGCCAC

.(((.....)))))))))

>cro-novel39

UUGAAAAUUAUGUUAUGAAUCUGAUUCACAUCCUCAUUCUGUAUCGUGUAGUUUAUUAUAAUAAUAG  
CACAUCACCUCCGAUUGUUGAUUAUGUCUUCAAUUAUGGAGAUACGGCUUAAAUAAGACCAAUGAUUUA  
UGAGGGGGACUUGGAUCAAGUUC AUGACAGAAUUUUUCAC

.(((.....)))))))))

>cro-novel4

UCUUCUAAGUUGGACACACCUCGAAGUACAUAUCUCUACUUCUCUCUCAUUCUCUCUUGUAUUUAAUUAU  
UGCUGAUCAUAAGAAGAAGGCAAAGGAUGUUGUUAAGAUCUGAUUUGUCCGAUCGAGAUAAAGAAUCUA  
UGCAUAAUUAUAAUACAAGAGAGAAUGAGAGAGAAGUAGAGAUAGUACUUCGAGGUGUGUCCAACUUAU  
GAAGA

.(((.....)))))))))

>cro-novel40

ACUGAAAACUGCAUUAUAGGAUGCAUCAAUCAUGCGGUUCGGUUGCUGUAACAUAUUUCUGUAACACU  
CUUUAUAACAUAUUAUUUGGUGUAUUUAUUAUAUAAAACCUACCAAUAAAAGAUAAACGCUAAAGAAA  
AAAGAUAAACCUAAGGGAGAAAACAUUAUUAUAAAAGGUAUGUUAACAGCAAUUGUUAUCAAUGGAUCUUGA  
GUGUCAUCAAUGGGCCUCCUUAUGAGUUUAUGUUUUUUUAGC

.(((.....)))))))))

>cro-novel41

UGUCCGCAGGAGAGAUUGCGCGGUCCGUCUGCAUGACUGACUGAUUCCGUCAAGAGACUCUGUUUUGAC  
CUGUCCUGUCUGGACGGCGUCAUCUCCUUGCGGACU





















AUGAUUAUAAAAGUAAUUAACAUGAUUCGAACCGAACUAGUAAAUAUGCAUAAACGAGUUUCAUGUGCA  
UGGUAAGGUGAUAGCUCACUACUAAAAACGUAUGUUUAUUAAGUUACAGUUCUGGAUUCGAAUCACAUCU  
CAUCCUCAAUAUUA

.((((...(((.....((((((((((((.....(((((((.....)))))))))((((...(((((((.....))))))))).....)))))).....))))))

>cro-novel95

AUUUAUAAUACUCAAGAUCGUCUAAUACAUCUGUAAUACACUCUCUACUUAUCUCCUUUUAAUUUAGAUUU  
UAUUUUUUAUUCUAUAAGAUUUUUUAUUAAUAAAAAUUUUAUAAAUAAGUAUUUAAAAAAAAUAUA  
AUAGAAGUACUAGACGAUCCGGCCAAAAUUAUAAA

.((((...(((.....((((((((((((.....(((((((.....)))))))))((((...(((((((.....))))))))).....)))))).....))))))

>cro-novel96

ACAUCUUCACCUGAGCGUUGGACAGUCUGGUGGGAAUUUCGCUUCUUAUAUAAAAAAUAAUCUGAUCU  
GUGGAUCAUUGUUUAAAUUCUGACUGGAAAUUUAACCUUUCAAUAUGAUAGGUGG

.((((...(((.....((((((((((((.....(((((((.....)))))))))((((...(((((((.....))))))))).....)))))).....))))))

>cro-novel97

UCGUUUGCCAGUGAGUCGACUCGAGCUCGGUCAAUAGUAAACUCAAAACCAAGUUUUGACCGAGCAACUGU  
GAUUGCUCACGAGCAACUCGC

.((((...(((.....((((((((((((.....(((((((.....)))))))))((((...(((((((.....))))))))).....)))))).....))))))

>cro-novel98

UUUAAUAGAAGGUAAUUGAGUUUGGUCUGUGAGUAUAAGAUUUAGAUUUUACCCGCUUAAGUGAAUAA  
GAUUUGGAUAAUGUUUAGAUAAAGACUUGACUGGUUUACUAUCCCUAUUAAU

.((((...(((.....((((((((((((.....(((((((.....)))))))))((((...(((((((.....))))))))).....)))))).....))))))

>cro-novel99

AUAUAAUUAUAAAAUUAUUAAUUAACACUCUCUAGUAUACACUAUUUAUAGUAAUUUUUAUUAAUAAAAU  
CGUAUAGAAUAAAAGAUAAAUCUAAACUUAUAAAAAAUAAAACCCUAAGAAAAAAUAAUUAUCAAAUAAA  
UGUACUAAAUAGUGUACUAGAGAAUGUAUUAGACGAUCUUGAGUGCAUAUAU

.((((...(((.....((((((((((((.....(((((((.....)))))))))((((...(((((((.....))))))))).....)))))).....))))))

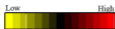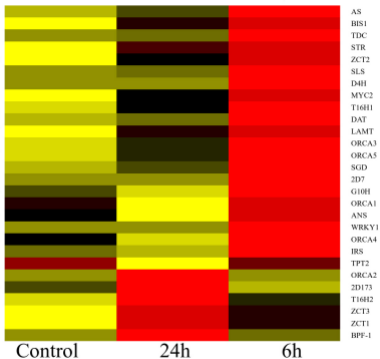

**Figure S4.** Heatmap of terpenoid indole alkaloid (TIA) biosynthesis pathway genes in response to different Jasmonic acid treatment regimes. The color scale represents the values of reads per kilobase of transcript per million fragments mapped (RPKM).

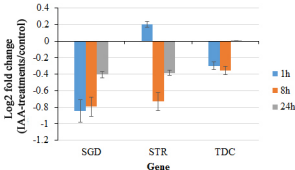

**Figure S5.** Quantitative real-time RT-PCR analysis of selected terpenoid indole alkaloid (TIA) biosynthetic pathway genes. The relative abundance of individual gene is presented as the ratio of auxin-treated and control samples. The mean expression value of target gene was normalized against the expression of endogenous control RPS9. The normalized expression ( $2^{-\Delta CT}$ ) in IAA-treated sample was divided by the normalized expression in control sample and  $\log_2$  transformed. The data represent the mean values  $\pm$ SD of three replicates.



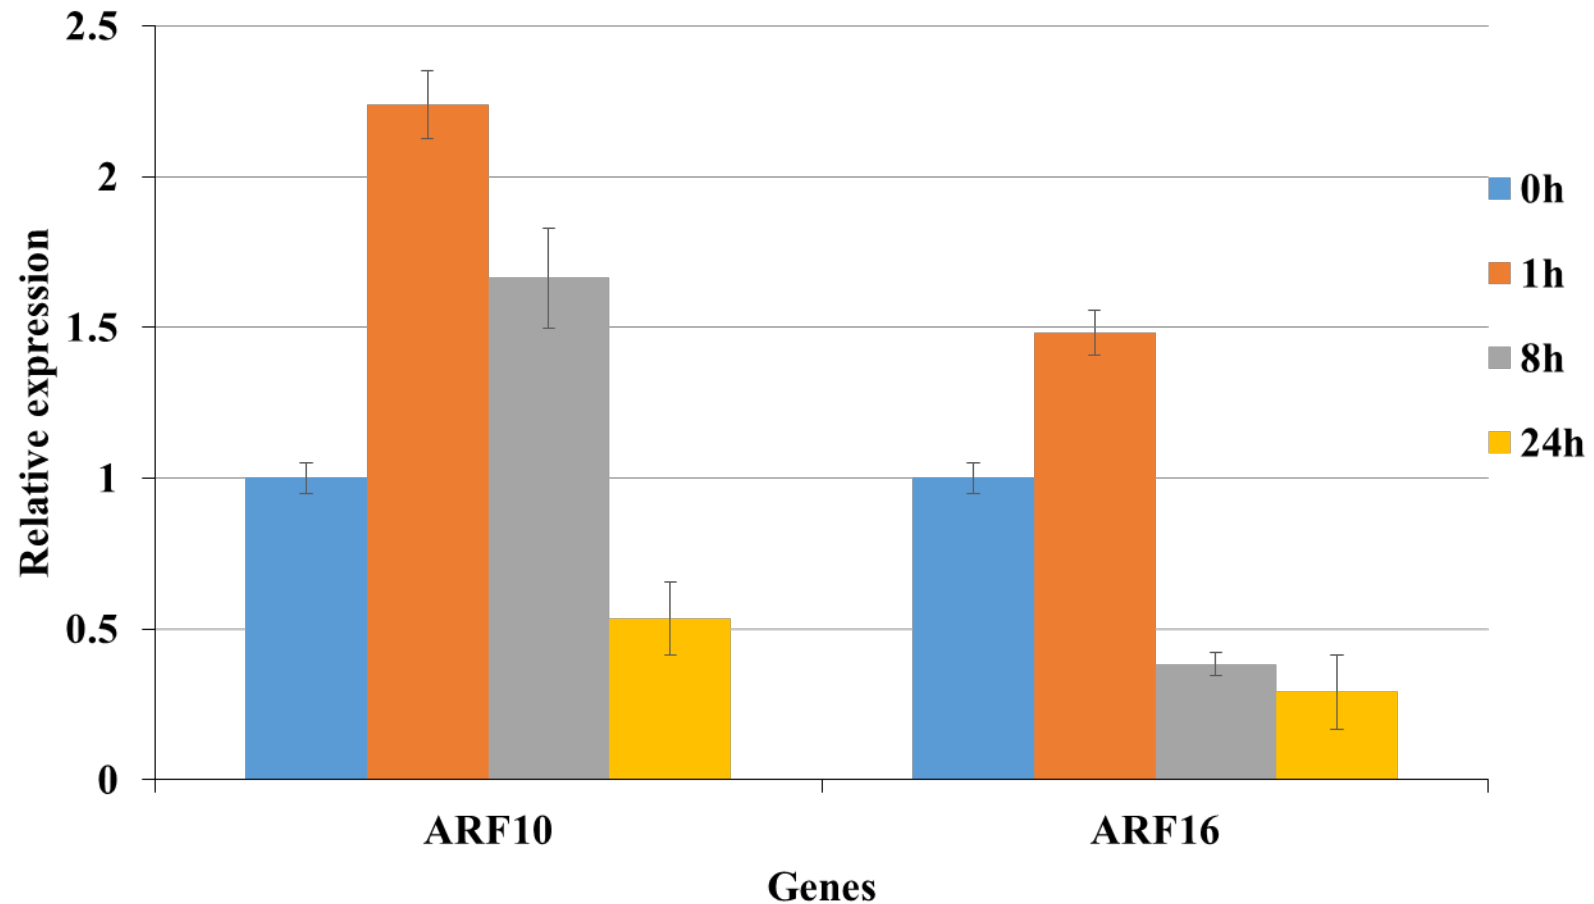

**Figure S6. Relative expression of *ARF10* and *ARF16* in the control and IAA-treated *C. roseus* seedlings as measured by quantitative RT-PCR.** The expression values of target genes were normalized against that of the endogenous control, RPS9. The data represent the mean  $\pm$  SD of two biological replicates.
